# Supplementary material for: Large Scale Ex Vivo Expansion of γδ T cells Using Artificial Antigen-presenting Cells
Source: PubMed Central journal article supplement — J Immunother. 2022 Nov 16;46(1):5–13. doi: 10.1097/CJI.0000000000000445 (PMC9722378; doi:10.1097/cji.0000000000000445), 2022-11-16
Supplement: cji-46-05-s001.pdf [file cji-46-05-s001.pdf]

# Figure S1

## A

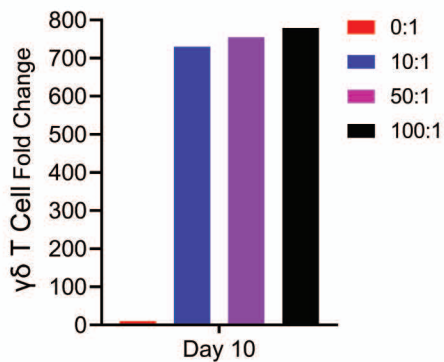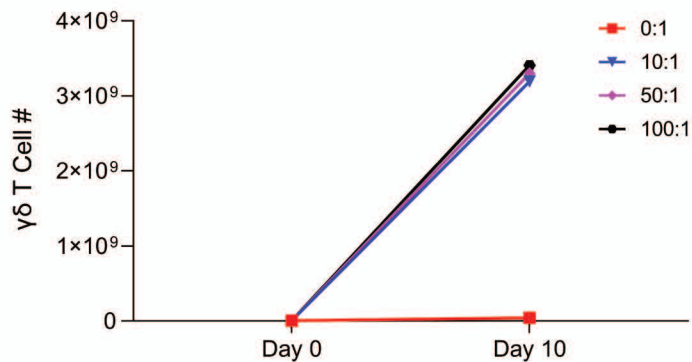

## B

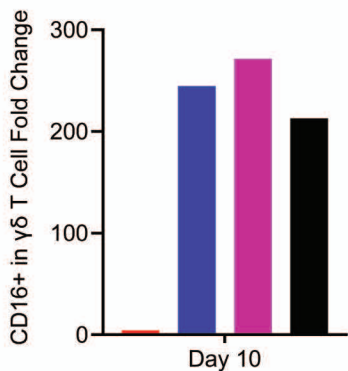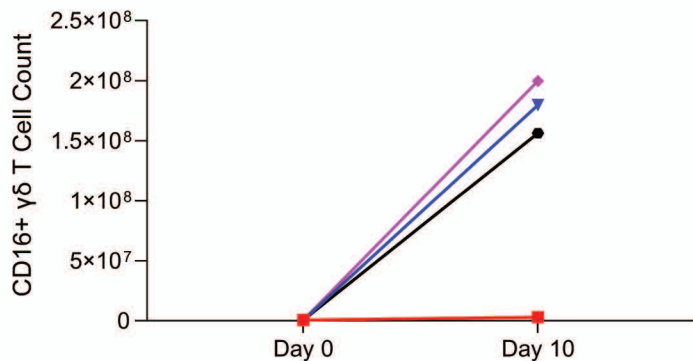

## C

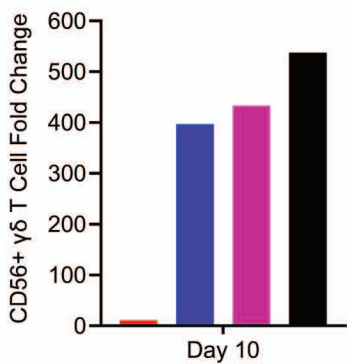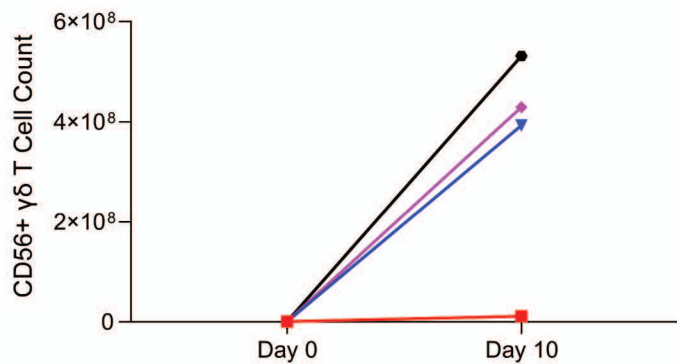

**Figure S1. aAPC: $\gamma\delta$  T cell ratios of 10:1 or higher facilitate similar expansion of  $\gamma\delta$  T cells.** Irradiated aAPCs were co-cultured with zol enriched  $\gamma\delta$  T cells at 0:1, 10:1, 50:1 and 100:1 aAPC: $\gamma\delta$  T cell ratios. At day 10  $\gamma\delta$  T cells were enumerated and phenotyped by flow cytometry. (A)  $\gamma\delta$  T cell fold change and cell counts are similar at all aAPC: $\gamma\delta$  T cell ratios. (B) CD16+  $\gamma\delta$  T cell fold change and counts are similar at all aAPC: $\gamma\delta$  T cell ratios. (C) CD56+  $\gamma\delta$  T cells have similar fold change and count at all aAPC: $\gamma\delta$  T cell ratios. Data is from a healthy donor.



|                                                              |                                                                                                                                                                                                                                                                                                                                                                                                                                                                                                                                                                                                                                                                                                                                                                                                                                                                                                                                                                                                                                                                                                                                                                                                                                                                                                                                                                                                                                                                                                                                                                                                                                                                                                                                                                                                                                                                                                                                                                                                                                                                                                                                                                                                                                                                                                                                                                                                                                                                                                                                                                                                                                                                                                                                                                                                                                                                                                                                                                                                                                                                                                                                                                                                                                                                                                                                                                                                                                                                                                                                                                                                                                                                                                                                                                                                                                                                                                                                                                                                                                                                                                                          |
|--------------------------------------------------------------|--------------------------------------------------------------------------------------------------------------------------------------------------------------------------------------------------------------------------------------------------------------------------------------------------------------------------------------------------------------------------------------------------------------------------------------------------------------------------------------------------------------------------------------------------------------------------------------------------------------------------------------------------------------------------------------------------------------------------------------------------------------------------------------------------------------------------------------------------------------------------------------------------------------------------------------------------------------------------------------------------------------------------------------------------------------------------------------------------------------------------------------------------------------------------------------------------------------------------------------------------------------------------------------------------------------------------------------------------------------------------------------------------------------------------------------------------------------------------------------------------------------------------------------------------------------------------------------------------------------------------------------------------------------------------------------------------------------------------------------------------------------------------------------------------------------------------------------------------------------------------------------------------------------------------------------------------------------------------------------------------------------------------------------------------------------------------------------------------------------------------------------------------------------------------------------------------------------------------------------------------------------------------------------------------------------------------------------------------------------------------------------------------------------------------------------------------------------------------------------------------------------------------------------------------------------------------------------------------------------------------------------------------------------------------------------------------------------------------------------------------------------------------------------------------------------------------------------------------------------------------------------------------------------------------------------------------------------------------------------------------------------------------------------------------------------------------------------------------------------------------------------------------------------------------------------------------------------------------------------------------------------------------------------------------------------------------------------------------------------------------------------------------------------------------------------------------------------------------------------------------------------------------------------------------------------------------------------------------------------------------------------------------------------------------------------------------------------------------------------------------------------------------------------------------------------------------------------------------------------------------------------------------------------------------------------------------------------------------------------------------------------------------------------------------------------------------------------------------------------------------|
|                                                              | <p>GCTCTTAGGAGTTTCCTAATACATCCCAAACCTCAAATATATAAAGCATTGGACTTGTCTATGCCCTAGG<br/> GGGCGGGGGGAAGCTAAGCCAGCTTTTTTAAACATTTAAAATGTTAATTCATTTTTAAATGCACAGATGT<br/> TTTTATTTTCATAAGGGTTTCAATGTGCATGAATGCTGCAATATTCTGTTACCAAAGCTAGTATAAATAAA<br/> AATAGATAAACGTGGAATTACTTAGAGTTTCTGTGCATTAACGTTTTCTTCCAGTTGACAACATAAATG<br/> CGCTGCTGAGCAAGCCAGTTTGCATCTGTCAGGATCAATTTCCCATTATGCCAGTCATATTAATTAAGT<br/> TCAATTAGTTGATTTTTATTTTTGACATATACATGTGAATGAAAGACCCACCTGTAGGTTTGGCAAGCTA<br/> GCTTAAGTAACGCCATTTTGAAGGCATGGAAAAATACATAACTGAGAATAGAAAAGTTTCAAGTCAAGGT<br/> CAGGAACAGATGGAACAGCTGAATATGGGCCAAACAGGATATCTGTGGTAAGCAGTTTCTGCCCCGGC<br/> TCAGGGCCAAAGAACAGATGGAACAGCTGAATATGGGCCAAACAGGATATCTGTGGTAAGCAGTTTCTG<br/> CCCCGGCTCAGGGCCAAGAACAGATGGTCCCAGATGCGGTCCAGCCCTCAGCAGTTTCTAGAGAACC<br/> ATCAGATGTTTCCAGGGTCCCCAAGGACCTGAAATGACCCTGTGCCTATTTGAACTAACCAATCAGT<br/> TCGCTTCTCGCTTCTGTTGCGCGCTTATGCTCCCCGAGCTCAATAAAAGACCCACAACCCTCACTC<br/> GGGGCGCCAGTCCCTCCGATTGACTGAGTCGCCCGGGTACCCGTGTATCCAATAAACCCCTTGTGAGTT<br/> GCATCCGACTTGTGGTCTCGCTGTTCCCTGGGAGGGTCTCCTCTGAGTGATTGACTACCCGTCAGCGG<br/> GGGTCTTTCATTTGGGGGCTCGTCCGGGATCGGGAGACCCCTGCCAGGGACCACCGACCCACCACC<br/> GGGAGGTAAAGCTGGCCAGCAACTTATCTGTGTCTGTCCGATTGTCTAGTGTCTGACTGATTTTTATG<br/> GCTGCGTCCGTAAGTACTAGCTAACTAGCTCTGTATCTGGCGGACCCCGTGGTGAAGTACAGGATTC<br/> GGAACACCCGGCCGAACCCTGGGAGACGTCCAGGGACTTCGGGGGCGGTTTTTGTGGCCCGACCT<br/> GAGTCTAAAATCCCGATCGTTTAGGACTCTTTGGTGCACCCCTTAGAGGAGGGATATGTGGTCTG<br/> GTAGGAGACGAGAACCTAAACAGTTCGCCCTCCGCTGATTTTTGCTTTCCGTTTTGGGACCGAAGC<br/> CGCGCCGCGCTTGTCTGCTGCAGCATGTTCTGTGTTGTCTGTCTGTCTGTCTGTCTGTCTGATTG<br/> TCTGAAAATATGGGCCCGGGCTAGACTGTTACCCTCCCTAAGTTTACCTTAGGTCACTGGAAAGAT<br/> GTCCGAGCGGATCGCTCACAACAGTCCGTTAGATGTCAAGAAGAGACGTTGGGTTACCTTCTGCTCTGC<br/> AGAATGGCCAACCTTTAACGTCCGATGGCCGCGAGACGGCACCTTTAACCGAGCTCATACCCAGG<br/> TTAAGATCAAGGTCTTTTACCTGGCCGCACTGGACACCCAGACCAGGTCACCCTACATCGTGAACCTGG<br/> GAAGCCTTGGCTTTTACCCTCCCTGGGTCAAGCCCTTTGTACACCCTAAGCCTCCGCCTCCTCTT<br/> CCTCCATCCGCCCGTCTCTCCCTTGAACCTCCTCGTTCCAGCCCGCTCGATCCTCCCTTATCCA<br/> GCCCTCACTCCTTCTAGGCGCCCCCATATGGCCATATGAGATCTTATATGGGGCACCCCGCCCTT<br/> GTAACCTCCCTGACCCTGACATGACAAGAGTTACTAACAGCCCTCTCTCCAAGCTCACTTACAGGT<br/> CTCTACTTAGTCCAGCACGAAGTCTGGAGACCTCTGGCGGCAGCCTACCAAGAACAACTGGACCGACC<br/> GGTGGTACCTCACCTTACCGAGTCGGCGACACAGTGTGGGTCCGCCGACACCAGACTAAGAACCTAG<br/> AACCTCGCTGGAAGGACCTTACACAGTCTGCTGACCACCCCAACCGCCCTCAAAGTAGACGGCATT<br/> GCAGCTGGATACACGCCGCCACCATGGCCAGCCCTGACAAGATTCTGAGCCTGAACCTGTCTGC<br/> TGCTGGGCGAGTCCATCATCTCGGCAGCGGCGAGGCCCAAGTGCAACTCAGGAATCCGGAGCTGA<br/> GCTGGCCAGACCCGGAGCCAGCGTGAAGATGCTCTGTAAGGCCTCCGGCTACACCTTACCAGGTACA<br/> CCATGCACTGGGTGAAGCAGAGGCCTGGCCAGGGCCTGGAGTGGATCGGCTACATCAATCCCAGCAG<br/> GGGCTACACCAATTACAATCAGAAGTTCAAGGACAAGGCCACCCTCACAACTGATAAGAGCAGCTCCA<br/> GGCCTACATGCAACTGAGCAGCCTGACCTCCGAGACTCCGCCGTGTACTACTGTGCGAGACTAC<br/> GACGACCACTACTGCCTGGACTACTGGGGCCAGGGCACACAGTGACAGTGAGCTCCGGCGGGCGGGC<br/> GCTCCGGCGGGCGGGCAGCGGGCGGGCGGGAAGCGACATTCAGCTGACCCAGAGCCCGCTATCA<br/> TGTCGGCCAGCCCTGGAGAGAAGGTGACCATGACCTGCAGCGCCAGCAGCAGCGTGAGCTACATGAA<br/> TGTGTTACCAGCAGAAGTCCGGCACCCAGCCCAAGAGGTGGATCTACGACACCAAGCAAGCTGGCTTC<br/> GGCGTGCCTGCCACTTTAGAGGCAGCGGCTCCGGCACAGCTACAGCCTGACCATCAGCGGCATGG<br/> AGGCTGAAGACGCCGCCACTACTACTGTCAGCAGTGGTCTCCAACCCCTTACCTTCCGGCAGCGGC<br/> ACAAAGCTGGAGATCAAGAGAGCTTTGTTTATTTTTTAAATACATTCAAATATGATCCGCTCATGAGAC<br/> AATAACCCGTATAAATGCTTCAATAATATTGAAAAGGAAGATGAGTATTCAACATTTCCGTGTCGC<br/> CCTTATCCCTTTTTGCGGCATTTTGCCTTCTGTTTTTGGCTCACCCAGAAACGCTGGTGAAGTAAAA<br/> GATGCTGAAGATCAGTTGGGTGCACGAGTGGGTTACATCGAACTGGATCTCAACAGCGGTAAGATCCTT<br/> GAGAGTTTTCGCCCCGAAGAACGTTTTCCAATGATGAGCACTTTTAAAGTTCTGCTATGTGGCGGGTA<br/> TTATCCCGTATTGACCCGGGCAAGGCAACTCGGTCCCGCATAACTATTCTCAGAATGACTTGGTT<br/> GAGTACTACCAAGTACAGAAAAGCATCTTACGGATGGCATGACAGTAAGAAATTATGCAGTGTGCC<br/> ATAACCATGAGTGATAAAGTGCAGGCAACTTACTTCTGACAACGATCGGAGGACCGAAGGAGCTAACC<br/> GCTTTTTTGCACAACATGGGGGATCATGTAACCTGCCTTGTGCTGGGAACCCGGAGCTGAATGAAGCC<br/> ATACCAAACGACGAGCGTGACACCAGATGCCTGTAGCAATGGCAACAACGTTGCGCAAACCTATTAAC<br/> GGCGAACT</p> |
| <p>humanCD2<br/> 8scFv-<br/> P2A-<br/> humanIL15<br/> RA</p> | <p>CCGGTGGTACCTCACCTTACCGAGTCGGCGACACAGTGTGGGTCCGCCGACACCAGACTAAGAACCT<br/> AGAACCTCGCTGGAAGGACCTTACACAGTCTGCTGACCACCCCAACCGCCCTCAAAGTAGACGGCA<br/> TCGCAGCTTGGATACACGCCGCCACCATGGCTCCCCCTCACCAGGTTCTGAGCCTGAACCTGCT<br/> GCTGCTGGGCGAGAGCATCATCTGGGAAGCGCGAGGCTCAGGTGCAGCTGCAGCAGAGCGGCAC<br/> CGAACTGGTGAAGCCTGCCTCCAGCGTGAAGATCAGCTGCAAGGCCAGCGGCTACACCTCCACAGC<br/> AACTACATGCACTGGATCAGGCAGCAGCCCGCAATGGCCTGGAGTGGATCGGCAGGATTTACCCG<br/> GCAACGGCAACACCAATACATCAGAAGTTCGATGGCAAGGCCACCCCAACCGCTGACAAGTCTCC<br/> TCCACCGCCTACATGCAGCTGAGCAGACTGACCTTCGAGGATAGCGCCGTCTACTTCTGCGCTAGCGC<br/> CCCTCTGGACTACGGAGGCCACATCATGGACGCTGGGCCAGGGCACCACTGACATGAGCTCC<br/> GGAGGGCGGGCAGCGGGCGGGCGGCAGCGGGGAGGGCGGCAGCGATATCCAGCTCACCCAGAG<br/> CCCTGCCTTTCTGAGCGCCAGCCTGGGCGAGACCGTGAGCATTGAGTGCCTCGGCTCCGAGGACATC<br/> TAGGGCTACCTGGCCTGGTATCAGCAGAAGCCCGGCAAGAGCCCAAGCTGCTGATCTACGTGGCCAA<br/> CAGGCTGCAAGGATGGCGTGCCTAGCAGATTTAGCGCTGGGGCAGCGGACCGCAAGTATCCCTCAAG<br/> ATCAGCGGATGCAGCCTGAGGACGAGGGCGACTACTACTGCCTCCAGGGCAGCAAGTTTCCCTCAC<br/> CTTCGGCAGCGCACCAAGCTGGAGATCAAAGGGCGGGCCACAACCACCCCGCTCCAGACCT</p>                                                                                                                                                                                                                                                                                                                                                                                                                                                                                                                                                                                                                                                                                                                                                                                                                                                                                                                                                                                                                                                                                                                                                                                                                                                                                                                                                                                                                                                                                                                                                                                                                                                                                                                                                                                                                                                                                                                                                                                                                                                                                                                                                                                                                                                                                                                                                                                                                                                                                                                                                                                                                                                                                                                                                                                                                                                                                                                                                                                                            |

CCTACACCCGCCCTACCATCGCCAGCCAACCTTTATCTTTAAGACCCGAGGCTTGTAGACCCGCCGT  
GGCGGCGCCGTGCACACAAGAGGACTGGACTTCGCTTGTGACATCTACATCTGGGCCCTCTGGCTG  
GAACTTGTGGCGTGTATTACTCTCTTTAGTGATTACTTTATATTGCAACCATAGGAATCGTAGGAGGGT  
GTGCAAGTGCCCTAGGCCGTGGTGAAGTCCGGCGCAAAACCCCTTTAAGCGCTAGGTACGTGGGA  
GCGGAGCCACAACTTCTCTTTACTGAAGCAAGCTGGCGACGTGGAAGAAAACCCCGGTCCCATGGCC  
CCCAGAAGAGCCAGAGGCTGCAGAACCCTCGGACTGCCCGCTTTACTGCTGCTGTTACTGCTGAGACC  
CCCCGCTACCAGAGGCATTACTTGTCCCCCTCCCATGAGCGTCGAGCATGCCGACATCTGGGTGAAGA  
GCTACTCTTTATATTCTCGTGAGAGGTACATCTGCAACTCCGGCTTCAAGAGAAAAGCCGGCACAAAGCT  
CTTTAACCGAGTGCCTGTGAACAAGGCTACAAACGTGGCCACTGGACCACCCCTCTTTAAATGCA  
TTCGTGATCCCGCTCTGGTGCACCAGAGACCCGCTCCTCCTCCACCGTGACCACAGCCGAGTGACC  
CCTCAGCCGAATCCCTCTCCCCCTCCGAAAGGAGCCCGCTGCCTCCAGCCCTCCAGCAACAACAC  
AACCACCGAGATCAGCAGCCACGAGAGCTCCACGGAACACCCAGCCAGACCACCGCCAAGAATTGGG  
AACTGACCGCTCCGCCAGCCATCAGCCTCCCGCGTGTATCCTCAAGGTCACAGCGACACCACAGTG  
GCCATTTCCACCAGCACCGTGTATTATGCGGACTGTCCGCTGTGCTTTACTGGCTTGTATTTAAAGT  
CTCGTCAGACCCCTCCTCTGGCTCCGTGGAGATGGAGCCATGGAGGCTTTACCCGTGACTTGGGGA  
ACCTCCTCTCGTGACGAGGATTTAGAGAAGTGCAGCCATCATTATGACAGCCACTGGGACCGGATT  
AGTCCAATTTGTTAAAGACAGGATATCAGTGGTCCAGGCTCTAGTTTTGACTCAACAATATCACCAGCTG  
AAGCCTATAGAGTACGAGCCATAGATAAAAATAAAGATTTTTATTAGTCTCCAGAAAAGGGGGGAATGA  
AAGACCCACCTGTAGGTTTGGCAAGTAGCTTAAGTAACGCCATTTTGAAGGCATGAAAAATACAT  
AACTGAGAATAGAGAAGTTTCAGATCAAGGTCAGGAACAGATGGAACAGCTGAATATGGGCCAAACAGG  
ATATCTGTGGTAAGCAGTTCCTGCCCGGCTCAGGGCCAAGAACAGATGGAACAGCTGAATATGGGCC  
AAACAGGATATCTGTGTAAGCAGTTCCTGCCCGGCTCAGGGCCAAGAACAGATGGTCCCAGATGC  
GGTCCAGCCCTCAGCAGTTTCTAGAGAACCATCAGATGTTTCCAGGGTGCCCAAGGACCTGAAATGA  
CCCTGTGCCTTATTTGAACATAACCAATCAGTTCGTTCTCGCTTCTGTTCCGCGCTTCTGCTCCCGGA  
GCTCAATAAAAGAGCCCAACCCCTCACTCGGGGCGCCAGTCTCCGATTGACTGAGTCGCCCGGGT  
ACCCGTGTATCCAATAAACCCCTCTTGCAGTTGCATCCGACTTGTGGTCTCGCTGTTCTTGGGAGGGTC  
TCCTCTGAGTGATTGACTACCCGTACGCGGGGGTCTTTACACATGCAGCATGTACAAAATTAATTTG  
TTTTTTTTTTTAAAGTATTTACATTAATGGCCATAGTACTTAAAGTTACATTGGCTTCCTGAAATAACA  
TGGAGTATTCAGAATGTGTCATAAATATTTCTAATTTAAGATAGTATCTCCATTGGCTTCTACTTTTTCT  
TTTTTTTTTTTTGCTCTGTCTCCATTTGTTGTTGTTGTTGTTGTTGTTGTTGTTGTTGTTGTTGTTG  
TTAATTTTTTTTTAAAGATCCTACACTATAGTTCAGACTAGACTATTAAGTACTCTGTAACCCAGGGTGAC  
CTTGAAGTCATGGGTAGCCTGCTGTTTTAGCCTTCCCACATCTAAGATTACAGGATGAGCTATCATT  
TTGATATTTGATTGATTGATTGATTGATGTGTGTGTGTGTGTGTGTGTGTGTGTGTGTGTGTGTGT  
GTGTGTATGGGTGTGTGTGAATGTGTGTATGTGTGTGTGTGTGTGTGTGTGTGTGTGTGTGTGTGT  
TGTGTGTGTGTGTGAAAAAATTTCTATGGTAGTGAGAGCCAACGCTCCGGCTCAGGTGTGACGGTGGT  
TTTTGAGACAGAGTCTTTCACCTTAGCTTGAATTCACTGGCCGTGTTTTTACAACCTGTGACTGGGAAA  
ACCCTGGCGTTACCCAACCTAATCGCCTTGCAGCACATCCCCCTTTCCGACGCTGGCGTAATAGCGAAG  
AGGCCCGCACCGATCGCCCTTCCAACAGTTGCGCAGCCTGAATGGCGAATGGCGCCTGATGCGGTA  
TTTTCTCCTTACGCATCTGTGCGGTATTTACACCCGCATATGGTGCACCTCAGTACAATCTGCTCTGAT  
GCCGCATAGTTAAGCCAGCCCGACACCCGCAACACCCGCTGACGCGCCCTTGTCTGTGCTGCTGCTG  
TCCCGGCATCCGCTTACAGACAAGCTGTGACCGTCTCCGGGAGCTGCATGTGTGACAGGTTTTACCCG  
TCATACCGAAACGCGCGATGACGAAAGGGCCTCGTGATACGCCTATTTTTATAGGTTAATGTCATGAT  
AATAATGGTTTCTTAGACGTCAGGTGGCCTTTTCCGGGAAATGTGCGCGGAACCCCTATTTGTTATTT  
TTCTAAATACATTCAAATATGTATCCGCTCATGAGACAATAACCCCTGATAAATGCTTCAATAATATGAAA  
AAGGAAGATGATGAGTATTCAACTTTCCGCTGCGCCCTTATCCCTTTTTTCCGGCATTTGCTTCCCT  
GTTTTTGTCAACCCAGAACGCTGGTGAAGTAAAAGATGCTGAAGATCAGTTGGGTGCACGAGTGGGT  
TACATCGAACTGGATCTCAACAGCGGTAAGATCCTTGAGAGTTTTCCGCCGAAGAACGTTTTCCAATG  
ATGAGCACTTTTAAAGTCTGCTATGTGGCGCGGTATTATCCCGTATTGACGCCGGCAAGAGCAACT  
GGTCGCCGCATACACTATTCTCAGAATGACTTGGTGTGAGTACTCACCAGTACAGAAAAGCATCTTACG  
GATGGCATGACAGTAAGAGAATTATGCAGTGTGCCATAACCATGAGTGATAACACTGCGGCCAACTTA  
CTTCTGACAACGATCGGAGGACCGAAGGAGCTAACCCTTTTTGCACAACATGGGGGATCATGTAAC  
CGCCTTGATCGTTGGGAACCGGAGCTGAATGAAGCCATACCAACGACGAGCGTGACACCACGATGCC  
GTAGCAATGGCAACAACGTTGCGCAAACTATAAAGTGGCGAACTACTTACTGACTTCCCGGCAACA  
ATTAATAGACTGGATGGAGGCGGATAAAGTTGCAGGACCCTTCTGCGCTCGGCCCTCCGGCTGGCT  
GGTTTTATTGCTGATAAATCTGGAGCCGGTGTGAGCGTGGGTCTCGCGGTATCATTGCAGCACTGGGGCA  
GATGGTAAGCCCTCCCGTATCGTAGTTATCTACACGACGGGAGTCAGGCAACTATGGATGAACGAAAT  
AGACAGATCGCTGAGATAGTGCCTCACTGATTAAGCACTGGTAACTGTCAGACCAAGTTTACTCATATA  
ACTTTAGATTGATTTAAACTTCAATTTTTAATTTAAAGGATCTAGGTGAAGATCCTTTTTGATAATCTCA  
TGACCAAAATCCCTAACGTGAGTTTTCGTCCACTGAGCGTCAGACCCCGTAGAAAAGATCAAAGGAT  
CTTCTTGAGATCCTTTTTTCTGCGCGTAATCTGCTGCTTGCAAAACAAAAAACCCGCTACCAGCGGT  
GGTTTTGTTGCCGGATCAAGAGCTACCAACTTTTTTCCGAAGGTAAGTGGCTTCCAGCAGAGCGCAGAT  
ACCAAATACTGCTTCTAGTGTAGCCGATAGTAGCCACTTCAAGAACCTTCAAGAACTGTGACAGCCGCTAC  
ATACCTCGCTCTGCTAATCCTGTTACCAGTGGCTGCTGCCAGTGGCGATAAGTCGTGTCTTACCGGGT  
GGACTCAAGACGATAGTTACCGGATAAGGCGCAGCGGTCCGGCTGAACGGGGGGTTCGTGCACACAG  
CCCAGCTTGAGCGAACGACCTACACCGAACTGAGATACCTACAGCGTGAGCATTTGAGAAAAGCGCCAC  
GCTTCCCGAAGGGAGAAAAGCGGACAGGATCCGGTAAAGCGGACGGTCCGAACGCTGTGACAGCCGCTAC  
GAGGGAGCTTCCAGGGGAAACGCCTGGTATCTTTATAGTCTGTGGGTTTTCCGCCACCTCTGACTTG  
AGCGTCGATTTTTGTGATGCTCGTCAGGGGGCGGAGCCTATGAAAAACGCCAGCAACGCGCCTTT

|                                                                                                                                                                                                                                                                                                                                                                                                                                                                                                                                                                                                                                                                                                                                                                                                                                                                                                                                                                                                                                                                                                                                                                                                                                                                                                                                                                                                                                                                                                                                                                                                                                                                                                                                                                                                                                                                                                                                                                                                                                                                                                                                                                                                                                                                                                                                                                                                                                                                                                                                                                                                                                                                                                                                                            |
|------------------------------------------------------------------------------------------------------------------------------------------------------------------------------------------------------------------------------------------------------------------------------------------------------------------------------------------------------------------------------------------------------------------------------------------------------------------------------------------------------------------------------------------------------------------------------------------------------------------------------------------------------------------------------------------------------------------------------------------------------------------------------------------------------------------------------------------------------------------------------------------------------------------------------------------------------------------------------------------------------------------------------------------------------------------------------------------------------------------------------------------------------------------------------------------------------------------------------------------------------------------------------------------------------------------------------------------------------------------------------------------------------------------------------------------------------------------------------------------------------------------------------------------------------------------------------------------------------------------------------------------------------------------------------------------------------------------------------------------------------------------------------------------------------------------------------------------------------------------------------------------------------------------------------------------------------------------------------------------------------------------------------------------------------------------------------------------------------------------------------------------------------------------------------------------------------------------------------------------------------------------------------------------------------------------------------------------------------------------------------------------------------------------------------------------------------------------------------------------------------------------------------------------------------------------------------------------------------------------------------------------------------------------------------------------------------------------------------------------------------------|
| <p>TTACGGTTCCTGGCCTTTTGTCTGGCCTTTTGTCTCACATGTTCTTTCCTGCGTTATCCCCTGATTCTGTGG<br/> ATAACCGTATTACCGCCTTTGAGTGAGCTGATACCGCTCGCCGCAGCCGAACGACCGAGCGCAGCGAG<br/> TCAGTGAGCGAGGAAGCGGAAGAGCGCCCAATACGCAAACCGCCTCTCCCCGCGGTTGGCCGATTC<br/> ATTAATGCAGCTGGCACGACAGGTTTCCCGACTGGAAAGCGGGCAGTGAGCGCAACGCAATTAATGTG<br/> AGTTAGCTCACTCATTAGGCACCCCCAGGCTTTACACTTTATGCTTCCGGCTCGTATGTTGTGTGGAATTG<br/> TGAGCGGATAACAATTTACACAGGAAACAGCTATGACCATGATTACGCCAAGCTTTGCTCTTAGGAGT<br/> TTCCATAACATCCCAAACCTCAAATATATAAAGCATTGACTTGTCTATGCCCTAGGGGGCGGGGGGAA<br/> GCTAAGCCAGCTTTTTTAAACATTTAAAATGTTAATTCATTTTAAATGCACAGATGTTTTATTTTATAAG<br/> GGTTTCAATGTGCATGAATGCTGCAATATTCCTGTTACCAAAGCTAGTATAAATAAAAAATAGATAAACGT<br/> GGAAATTACTTAGAGTTTCTGTCTAATACGTTTCTTCCCTCAGTTGACAACATAAATGCGCTGCTGAGCA<br/> AGCCAGTTTGCATCTGTCAGGATCAATTTCCATTATGCCAGTCATATTAATTAAGTCAATTAAGTTGAT<br/> TTTTATTTTTGACATATACATGTGAATGAAAGACCCACCTGTAGGTTTGGCAAGCTTAAGTAACG<br/> CCATTTTGAAGGCATGGAAAAATACATAAAGTGAATAAGAAAAGTTGAGTCAAGGTCAGGAACAGAT<br/> GGAACAGCTGAATATGGGCCAAACAGGATATCTGTGGTAAGCAGTTCCCTGCCCGGCTCAGGGCCAAG<br/> AACAGATGGAACAGCTGAATATGGGCCAAACAGGATATCTGTGGTAAGCAGTTCCCTGCCCGGCTCAG<br/> GGCCAAGAACAGATGGTCCCAGATGCGGTCCAGCCCTCAGCAGTTTCTAGAGAACCATCAGATGTTT<br/> CCAGGGTGCCCCAAGGACCTGAAATGACCCCTGTCCCTTATTTGAACATAACCAATCAGTTCCGCTTCTCGC<br/> TTCTGTTCCGCGCTTATGCTCCCCGAGCTCAATAAAGAGCCCACAACCCCTCACTCGGGGCGCCAG<br/> TCCTCCGATTGACTGAGTCGCCCCGGGTACCCGTGTATCCAATAAACCCTCTTGCAGTTGCATCCGACTT<br/> GTGGTCTCGCTGTTCTTGGGAGGGTCTCCTCTGAGTGATTGACTACCCGTGACGGGGGCTTTTCATT<br/> TGGGGGCTCGTCCGGGATCGGGAGACCCCTGCCAGGGACCACCGACCCACCACCGGGAGGTAAGC<br/> TGGCCAGCAACTTATCTGTGTCTGTCCGATTGTCTAGTGTCTATGACTGATTTTTATGCGCCTGCGTCCGT<br/> ACTAGTTAGCTAACTAGCTCTGTATCTGGCCGACCCGTGGTGGAAGTACGAGTTCGGAACACCCCGC<br/> CGCAACCCCTGGGAGACGTCCCAGGGACTTCGGGGGGCCGTTTTTGTGGCCCGACCTGAGTCCTAAAATC<br/> CCGATCGTTTAGGACTCTTTGGTGCACCCCTTAGAGGAGGGATATGTGTTCTGGTAGGAGACGAG<br/> AACCTAAAACAGTTCCCGCTCCGTCTGAATTTTTGCTTTTGGTTTGGGACCGAAGCCGCGCCGCGCT<br/> CTTGCTGCTGCAGCATCGTTCTGTGTTGTCTGTCTGACTGTGTTTCTGTATTTGTCTGAAAATATGG<br/> GCCCGGGCTAGACTGTTACCACTCCCTAAGTTTACCTTAGGTCAGTGGAAAGATGTCGAGCGGATC<br/> GCTACAACCAAGTCGGTAGATGTCAAGAAGAGACGTTGGTTACCTTCTGCTGCAAGATGGCCAAC<br/> CTTTAACGTCGGATGGCCGCGAGACGGCACCTTTAACCGAGACCTCATCACCCAGGTTAAGATCAAGG<br/> TCTTTTACCTGGCCGCATGGACACCCAGACCAGTCCCCTACATCGTACCTGGGAAGCCTTGGCT<br/> TTTGACCCCCCTCCCTGGGTCAAGCCCTTTGTACACCCTAAGCCCTCCGCTCCTCTTCTCCATCCGCC<br/> CCGTCTCTCCCCCTTGAACCTCCTCGTTCCGACCCCGCTCGATCCTCCCTTTATCCAGCCCTCACTCCT<br/> TCTTAGGCGCCCCATATGGCCATATGAGATCTTATATGGGGCACCCCGCCCTTGTAAACTTCCCT<br/> GACCCTGACATGACAAGAGTTACTAACAGCCCTCTCTCAAGCTCACTTACAGGCTCTACTTAGTC<br/> CAGCACGAAGTCTGGAGACCTCTGGC<br/> GGCAGCTACCAAGAACAACCTGGACCGA</p> |
|------------------------------------------------------------------------------------------------------------------------------------------------------------------------------------------------------------------------------------------------------------------------------------------------------------------------------------------------------------------------------------------------------------------------------------------------------------------------------------------------------------------------------------------------------------------------------------------------------------------------------------------------------------------------------------------------------------------------------------------------------------------------------------------------------------------------------------------------------------------------------------------------------------------------------------------------------------------------------------------------------------------------------------------------------------------------------------------------------------------------------------------------------------------------------------------------------------------------------------------------------------------------------------------------------------------------------------------------------------------------------------------------------------------------------------------------------------------------------------------------------------------------------------------------------------------------------------------------------------------------------------------------------------------------------------------------------------------------------------------------------------------------------------------------------------------------------------------------------------------------------------------------------------------------------------------------------------------------------------------------------------------------------------------------------------------------------------------------------------------------------------------------------------------------------------------------------------------------------------------------------------------------------------------------------------------------------------------------------------------------------------------------------------------------------------------------------------------------------------------------------------------------------------------------------------------------------------------------------------------------------------------------------------------------------------------------------------------------------------------------------------|

**Table S1.** Nucleotide sequences of constructs

**Table S2**

|         | Day 7: Seeding density of Total number of cells per G-REX100 MCS Flask | Day 7: Number of $\gamma\delta$ T cells per Flask | # of G-REX 100MCS flasks used | Day 17: Total number of $\gamma\delta$ T cells at harvest |
|---------|------------------------------------------------------------------------|---------------------------------------------------|-------------------------------|-----------------------------------------------------------|
| Donor 1 | $5 \times 10^6$ cells/flask                                            | $4.68 \times 10^6$ cells/flask                    | 1                             | $3.3 \times 10^9$ cells                                   |
| Donor 2 | $5 \times 10^6$ cells/flask                                            | $2.22 \times 10^6$ cells/flask                    | 1                             | $2.65 \times 10^8$ cells                                  |
| Donor 3 | $5 \times 10^6$ cells/flask                                            | $4.38 \times 10^6$ cells/flask                    | 1                             | $2.58 \times 10^9$ cells                                  |

**Table S2.** Total viable counts of  $\gamma\delta$  T cells after 10 days expansion in the presence of aAPCs.
